# Supplementary material for: Thyroid status and mortality in nonagenarians from long-lived families and the general population
Source: PubMed Central journal article supplement (PMC5680564; doi:10.18632/aging.101310), 2017-10-25
Supplement: aging-09-2223-s001.pdf [file aging-09-2223-s001.pdf]

**SUPPLEMENTARY MATERIAL**

**Table S1. Interaction between parameters of thyroid status and population of origin on mortality.**

| Parameter of thyroid status | Interaction P-value |
|-----------------------------|---------------------|
| TSH                         | 0.70                |
| fT4                         | 0.97                |
| fT3                         | 0.74                |
| fT4xTSH                     | 0.82                |
| fT4/TSH                     | 0.88                |
| fT3/fT4                     | 0.77                |

Data are presented as P-value for interaction term for parameter of thyroid status and study population on the Cox regression adjusted for age and hsCRP.

**Table S2. Parameters of thyroid status and mortality rate in nonagenarians.**

| Parameter of thyroid status | Hazard ratio (95% CI) | P-value               |
|-----------------------------|-----------------------|-----------------------|
| TSH                         | 0.91 (0.78-1.07)      | 0.25                  |
| fT4                         | 1.22 (1.04-1.43)      | 0.02                  |
| fT3                         | 0.73 (0.62-0.86)      | 1.31x10 <sup>-4</sup> |
| fT4xTSH                     | 1.00 (0.85-1.17)      | 0.99                  |
| fT4/TSH                     | 1.09 (0.94-1.27)      | 0.26                  |
| fT3/fT4                     | 0.65 (0.55-0.77)      | 5.64x10 <sup>-7</sup> |

Data are presented as Hazard ratios for weighted averages of mortality rates of the highest compared to lowest sex-specific tertiles in the Leiden Longevity Study and the Leiden 85-plus Study.
